# Supplementary material
Source: bioRxiv or medRxiv preprint supplement (https://medrxiv.org/highwire/filestream/82649/field_highwire_adjunct_files/0/2020.05.25.20111757-1.pdf)
Supplement: Supplementary file [file 2020.05.25.20111757-1.pdf]

**Supplemental Table 1. Subgroup analysis of patients with and without hypertension or coronary heart disease**

|                          | Hypertension              |                       | <i>P</i> value | Coronary heart disease    |                      | <i>P</i> value |
|--------------------------|---------------------------|-----------------------|----------------|---------------------------|----------------------|----------------|
|                          | Without<br>(n=294, 88.6%) | With<br>(n=38, 11.4%) |                | Without<br>(n=321, 96.7%) | With<br>(n=11, 3.3%) |                |
| <b>Sex</b>               |                           |                       |                |                           |                      |                |
| Male, n (%)              | 112(38.1)                 | 20(52.6)              | 0.085          | 127 (39.6)                | 5 (45.5)             | 0.759          |
| Female, n (%)            | 182(61.9)                 | 18(47.4)              | 0.085          | 194 (60.4)                | 6 (54.5)             | 0.759          |
| <b>Age, median (IQR)</b> | 50 (39-59)                | 56 (49-60)            | 0.009          | 51(40-59)                 | 56(45-64)            | 0.174          |
| <b>Symptoms</b>          |                           |                       |                |                           |                      |                |
| Fever, n (%)             | 156(64.2)                 | 21(56.8)              | 0.382          | 169 (62.8)                | 8 (72.7)             | 0.751          |
| Cough, n (%)             | 93(38.3)                  | 15(39.5)              | 0.887          | 104(32.4)                 | 4(36.4)              | 0.885          |
| Fatigue, n (%)           | 29(11.9)                  | 10(27.0)              | 0.014          | 34(12.6)                  | 5(45.5)              | 0.002          |
| Chest Tightness , n (%)  | 18(7.4)                   | 14(38.9)              | <0.001         | 26(9.7)                   | 6(54.5)              | <0.001         |
| Diarrhea, n (%)          | 9(3.7)                    | 2(5.4)                | 0.644          | 10(3.1)                   | 1(9.1)               | 0.362          |
| Headache, n (%)          | 5(2.1)                    | 2(5.4)                | 0.233          | 7(2.6)                    | 0(0.0)               | 1.000          |
| Sore throat, n (%)       | 4(1.7)                    | 0(0.0)                | 1.000          | 4(1.5)                    | 0(0.0)               | 1.000          |
| Rhinorrhea, n (%)        | 4(1.7)                    | 0(0.0)                | 1.000          | 4(1.5)                    | 0(0.0)               | 1.000          |
| Myalgia, n (%)           | 9(3.7)                    | 3(8.1)                | 0.233          | 11(4.1)                   | 1(9.1)               | 0.388          |
| Toothache, n (%)         | 2 (0.7)                   | 0 (0.0)               | 1.000          | 1(0.3)                    | 1(9.1)               | 0.065          |
| <b>Comorbidity</b>       |                           |                       |                |                           |                      |                |
| Diabetes, n (%)          | 7(2.4)                    | 4(10.5)               | 0.027          | 11(34.3)                  | 0(0.0)               | 0.532          |
| Lung disease , n         | 5(1.7)                    | 2(5.3)                | 0.185          | 5(1.6)                    | 2(18.2)              | 0.019          |

( % )

|                                                        |                  |                  |       |                  |                  |       |
|--------------------------------------------------------|------------------|------------------|-------|------------------|------------------|-------|
| <b>Radiologic abnormality, n (%)</b>                   | 185 (66.3)       | 16 (57.1)        | 0.331 | 199(66.6)        | 2(25.0)          | 0.022 |
| <b>Positive SARS-CoV-2 testing by RT-PCR</b>           |                  |                  |       |                  |                  |       |
| Twice or more, n (%)                                   | 64(22.5)         | 8(28.6)          | 0.463 | 69 (22.6)        | 3 (37.5)         | 0.391 |
| Once, n (%)                                            | 221(77.5)        | 20(71.4)         | 0.463 | 236 (77.4)       | 5 (62.5)         | 0.391 |
| <b>Laboratory findings</b>                             |                  |                  |       |                  |                  |       |
| Red-blood cell count*10 <sup>12</sup> /L, median (IQR) | 4.37 (4.02-4.69) | 4.51 (4.16-4.90) | 0.094 | 4.39 (4.05-4.74) | 4.28 (4.00-4.54) | 0.506 |
| White-cell count *10 <sup>9</sup> /L, median (IQR)     | 5.25 (4.48-6.37) | 5.55 (4.74-6.35) | 0.875 | 5.25 (4.49-6.37) | 5.19 (4.60-5.93) | 0.816 |
| Neutrophil count *10 <sup>9</sup> /L, median (IQR)     | 3.21 (2.58-4.12) | 3.23 (2.55-3.80) | 0.828 | 3.24 (2.58-4.08) | 2.85 (2.25-3.69) | 0.392 |
| Lymphocyte count*10 <sup>9</sup> /L, median (IQR)      | 1.58 (1.26-1.91) | 1.73 (1.26-1.92) | 0.397 | 1.61 (1.26-1.91) | 1.58(1.20-2.39)  | 0.683 |
| NLR, median (IQR)                                      | 2.07 (1.57-2.69) | 2.04 (1.65-2.37) | 0.729 | 2.07 (1.61-2.67) | 1.66(1.11-3.06)  | 0.340 |
| Platelet count*10 <sup>9</sup> /L, median (IQR)        | 261 (216-313)    | 255 (204-289)    | 0.325 | 259 (216-312)    | 221(193-270)     | 0.254 |
| Hemoglobin, g/L, median (IQR)                          | 135 (125-144)    | 139 (131-146)    | 0.154 | 135 (125-145)    | 135(125-143)     | 0.869 |
| C-reactive protein,                                    |                  |                  |       |                  |                  |       |

|                                                                 |            |           |       |           |          |       |
|-----------------------------------------------------------------|------------|-----------|-------|-----------|----------|-------|
| <10.00 mg/L                                                     | 236(85.2)  | 25(83.3)  | 0.788 | 255(85.3) | 6(75.0)  | 0.421 |
| ≥10.00 mg/L                                                     | 41(14.8)   | 5(16.7)   | 0.788 | 44(14.7)  | 2(25.0)  | 0.421 |
| <b>Median length of symptoms onset to admission, days (IQR)</b> | 12 (7-17)  | 13 (7-17) | 0.942 | 12(8-16)  | 17(7-26) | 0.131 |
| <b>Median length of hospital stay, days (IQR)</b>               | 14 (10-19) | 15 (7-20) | 0.730 | 14(10-19) | 15(2-18) | 0.487 |
| <b>Clinical outcomes at data cutoff</b>                         |            |           |       |           |          |       |
| Discharge, n (%)                                                | 253 (86.1) | 21 (55.3) | 0.001 | 273(85.0) | 1(9.1)   | 0.001 |
| Require intensive care, n (%)                                   | 41 (13.9)  | 17 (44.7) | 0.001 | 48(15.0)  | 10(90.9) | 0.001 |

---

Abbreviation: IQR, interquartile range; NLR, neutrophil to lymphocyte ratio.

**Supplemental Table 2. Univariable analyses of the risk factors between stable group and intensive group**

| <b>Characteristic</b>                        | <b>Stable group<br/>(n=274, 82.5%)</b> | <b>Intensive group<br/>(n=58, 17.5%)</b> | <b><math>\beta</math></b> | <b><i>OR</i></b> | <b><i>CI</i></b> | <b><i>P</i> Value</b> |
|----------------------------------------------|----------------------------------------|------------------------------------------|---------------------------|------------------|------------------|-----------------------|
| <b>Sex</b>                                   |                                        |                                          |                           |                  |                  |                       |
| Male, n (%)                                  | 105 (38.3)                             | 27 (46.6)                                | 0.337                     | 1.402            | 0.792-2.480      | 0.246                 |
| <b>Age, median (IQR)</b>                     | 50.5 (40-59)                           | 52 (42-60)                               | 0.006                     | 1.006            | 0.983-1.030      | 0.604                 |
| <b>Symptoms</b>                              |                                        |                                          |                           |                  |                  |                       |
| Fever, n (%)                                 | 142 (63.4)                             | 35 (62.5)                                | -0.038                    | 0.962            | 0.525-1.763      | 0.901                 |
| Cough, n (%)                                 | 88 (39.1)                              | 20 (35.7)                                | -0.145                    | 0.865            | 0.471-1.590      | 0.640                 |
| Fatigue, n (%)                               | 28 (12.5)                              | 11 (19.6)                                | 0.537                     | 1.711            | 0.793-3.692      | 0.171                 |
| Chest Tightness, n (%)                       | 15 (6.7)                               | 17 (29.3)                                | 1.799                     | 6.044            | 2.788-13.107     | <0.001                |
| Diarrhea, n (%)                              | 8 (3.6)                                | 3 (5.4)                                  | 0.424                     | 1.528            | 0.392-5.957      | 0.541                 |
| Headache, n (%)                              | 6(2.7)                                 | 1(1.8)                                   | -0.415                    | 0.661            | 0.078-5.601      | 0.704                 |
| Sore throat, n (%)                           | 2(0.9)                                 | 2(3.4)                                   | 1.409                     | 4.093            | 0.564-29.713     | 0.164                 |
| Rhinorrhea, n (%)                            | 4(1.8)                                 | 0(0.0)                                   | 0                         | 1                |                  |                       |
| Myalgia, n (%)                               | 9(4.0)                                 | 3(5.4)                                   | 0.302                     | 1.352            | 0.354-5.168      | 0.659                 |
| <b>Comorbidity</b>                           |                                        |                                          |                           |                  |                  |                       |
| CVD, n (%)                                   | 25(7.5)                                | 23(39.7)                                 | 1.879                     | 6.545            | 3.357-12.762     | <0.001                |
| Coronary heart disease, n (%)                | 1(0.4)                                 | 10(17.2)                                 | 4.040                     | 56.875           | 7.117-454.518    | <0.001                |
| Hypertension, n (%)                          | 21 (7.7)                               | 16 (27.9)                                | 1.609                     | 4.995            | 2.433-10.258     | <0.001                |
| Diabetes, n (%)                              | 7 (2.6)                                | 4 (6.9)                                  | 1.039                     | 2.825            | 0.799-9.987      | 0.107                 |
| Lung disease, n (%)                          | 4 (1.5)                                | 3 (5.2)                                  | 1.303                     | 3.682            | 0.801-16.915     | 0.094                 |
| <b>Radiologic abnormality, n (%)</b>         | 183 (70.1)                             | 18 (36.7)                                | -1.436                    | 0.238            | 0.125-0.451      | <0.001                |
| <b>Positive SARS-CoV-2 testing by RT-PCR</b> |                                        |                                          |                           |                  |                  |                       |
| Twice or more, n (%)                         | 48 (18.3)                              | 24 (48.0)                                | 1.419                     | 4.135            | 2.187-7.817      | <0.001                |

|                                                                         |                 |                 |        |       |             |        |
|-------------------------------------------------------------------------|-----------------|-----------------|--------|-------|-------------|--------|
| Once, n (%)                                                             | 215 (81.7)      | 26 (74)         | 1.419  | 4.135 | 2.187-7.817 | <0.001 |
| <b>Laboratory findings</b>                                              |                 |                 |        |       |             |        |
| Red-blood cell count*10 <sup>12</sup> /L,<br>median (IQR)               | 4.39(4.05-4.73) | 4.42(4.02-4.76) | -0.959 | 0.909 | 0.532-1.552 | 0.726  |
| White-cell count *10 <sup>9</sup> /L, median<br>(IQR)                   | 5.19(4.47-6.33) | 5.62(4.88-6.58) | 0.192  | 1.212 | 1.010-1.453 | 0.058  |
| Neutrophil count *10 <sup>9</sup> /L, median<br>(IQR)                   | 3.18(2.55-3.98) | 3.49(2.67-4.27) | 0.191  | 1.211 | 0.957-1.532 | 0.111  |
| Lymphocyte count, *10 <sup>9</sup> /L, median<br>(IQR)                  | 1.58(1.26-1.86) | 1.80(1.26-2.17) | 0.634  | 1.886 | 1.073-3.314 | 0.027# |
| NLR, median (IQR)                                                       | 2.1 (1.6-2.7)   | 2.1 (1.5-2.8)   | -0.027 | 0.973 | 0.716-1.324 | 0.863  |
| Platelet count*10 <sup>9</sup> /L,<br>median (IQR)                      | 267(218-324)    | 223(194-269)    | -0.009 | 0.991 | 0.987-0.996 | 0.001  |
| Hemoglobin, g/L, median (IQR)                                           | 135(126-144)    | 135(122-145)    | -0.006 | 0.994 | 0.977-1.011 | 0.497  |
| C-reactive protein<br>≥10.00 mg/L                                       | 40 (15.6)       | 6 (12.0)        | -0.301 | 0.740 | 0.296-1.851 | 0.520  |
| <b>Median length of symptoms onset to<br/>admission, days<br/>(IQR)</b> | 12 (8-15)       | 13 (6-21)       | 0.025  | 1.025 | 0.991-1.061 | 0.157  |
| <b>Median length of hospital stay, days<br/>(IQR)</b>                   | 14 (10-19)      | 15 (11-21.5)    | 0.023  | 1.024 | 0.979-1.070 | 0.303  |

Abbreviation: IQR, interquartile range; NLR, neutrophil to lymphocyte ratio.

## Supplemental Figure 1 Discharge rate during hospitalization between patients with vs without hypertension

### A. Time from onset

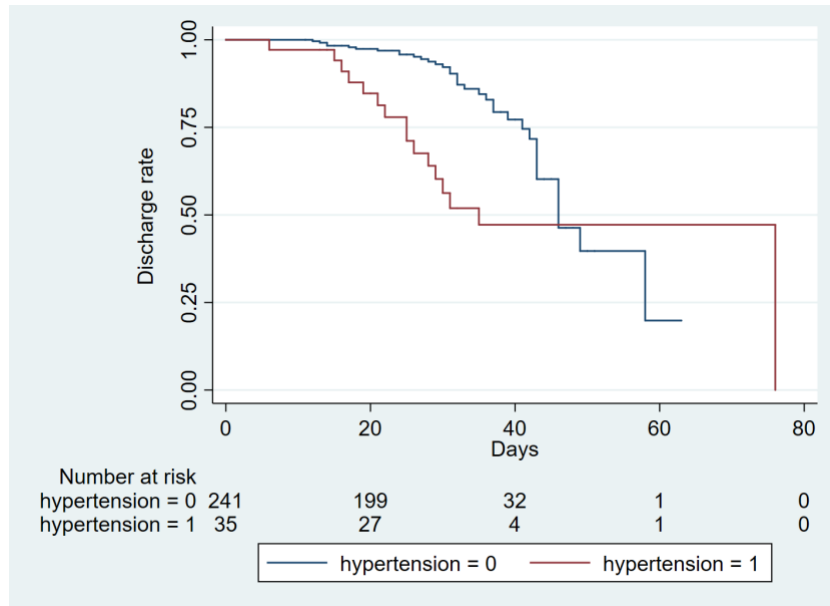

### B. Time from admission

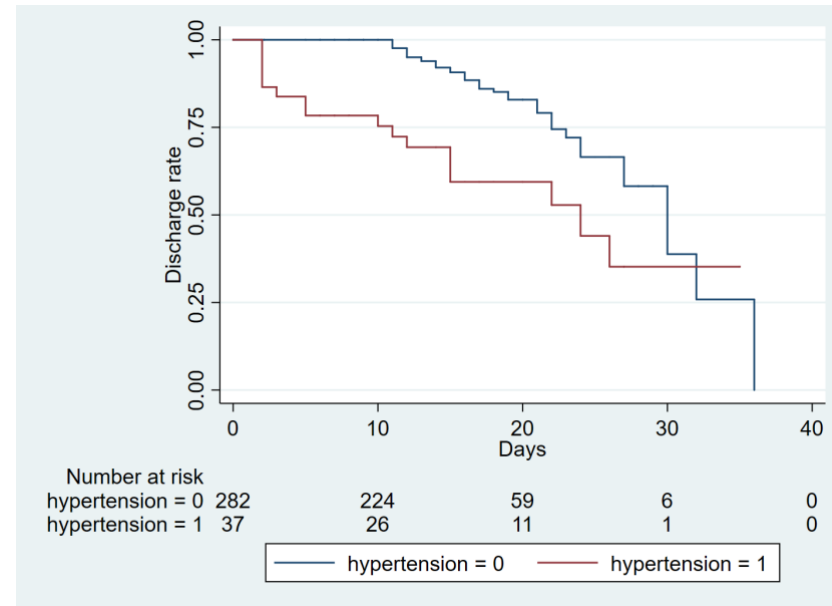

### C. Comparisons of outcomes

| Groups               | No. of events/<br>No. of patients | time from onset           | P value<br>log-rank | Groups               | No. of events/<br>No. of patients | time from admission       | P value<br>log-rank |
|----------------------|-----------------------------------|---------------------------|---------------------|----------------------|-----------------------------------|---------------------------|---------------------|
|                      |                                   | Duration, Mean (range), d |                     |                      |                                   | Duration, Mean (range), d |                     |
| Without hypertension | 36/241                            | 33(12-58)                 | P<0.001             | Without hypertension | 39/282                            | 18(11-36)                 | P<0.001             |
| With hypertension    | 16/35                             | 26(6-76)                  |                     | With hypertension    | 17/37                             | 10(2-26)                  |                     |

**Supplemental Figure 2 Discharge rate during hospitalization between patients with vs without coronary heart disease (CHD)**

**A. Time from onset**

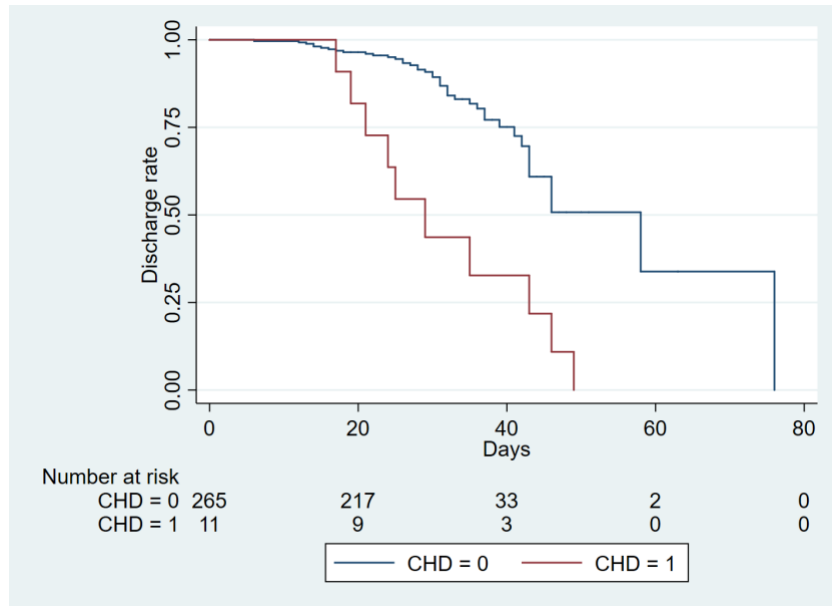

**B. Time from admission**

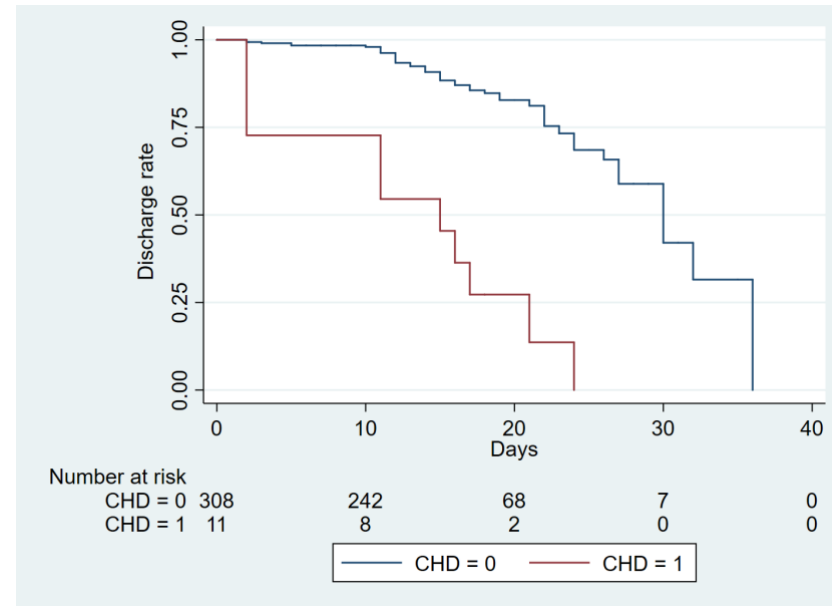

**C. Comparisons of outcomes**

| Groups      | No. of events/<br>No. of patients | time from onset           | P value<br>log-rank | Groups      | No. of events/<br>No. of patients | time from admission       | P value<br>log-rank |
|-------------|-----------------------------------|---------------------------|---------------------|-------------|-----------------------------------|---------------------------|---------------------|
|             |                                   | Duration, Mean (range), d |                     |             |                                   | Duration, Mean (range), d |                     |
| Without CHD | 42/265                            | 13(6-76)                  | P<0.001             | Without CHD | 46/308                            | 17(2-36)                  | P<0.001             |
| With CHD    | 10/11                             | 31(17-49)                 |                     | With CHD    | 10/11                             | 12(2-24)                  |                     |
